# Supplementary material for: Perylenediimide-cored cationic nanocarriers deliver virus DNA to kill insect pests
Source: Royal Society of Chemistry journal article supplement (doi:10.1039/c6py00574h), 2016-01-01
Supplement: c6py00574h1.pdf [file c6py00574h1.pdf]

## Supporting information for

# Perylenediimide-cored cationic nanocarriers deliver virus DNA to kill insect pest

Xiaoxia Liu,<sup>a</sup> Yang Zheng,<sup>a</sup> Shaobo Zhang,<sup>b</sup> Kelan Liu,<sup>b</sup> Songdou Zhang,<sup>a</sup> Meizhen Yin,<sup>b</sup> Long Zhang,<sup>a</sup> and Jie Shen,<sup>\*a</sup>

<sup>a</sup> Department of Entomology, China Agricultural University, 100193 Beijing, China, E-mail: shenjie@cau.edu.cn

<sup>b</sup> State Key Laboratory of Chemical Resource Engineering, Key Laboratory of Carbon Fiber and Functional Polymers, Ministry of Education, Beijing Laboratory of Biomedical Materials, Beijing University of Chemical Technology, 100029 Beijing, China

### Zeta-potential of P1 and D2

**Table S1** The zeta-potential of P1<sup>1</sup> and D2.<sup>2</sup>

|    | Zeta-potential         |
|----|------------------------|
| P1 | 48.4 mv <sup>[1]</sup> |
| D2 | 55.7 mv                |

### REFERENCES

1. He, B.; Chu, Y.; Yin, M.; Müllen, K.; An, C.; Shen, J., Fluorescent nanoparticle delivered dsRNA toward genetic control of insect pests. *Advan Mater* **2013**, *25* (33), 4580-4584.
2. Liu, X.; He, B.; Xu, Z.; Yin, M.; Yang, W.; Zhang, H.; Cao, J.; Shen, J., A functionalized fluorescent dendrimer as a pesticide nanocarrier: application in pest control. *Nanoscale* **2015**, *7* (2), 445-449.
